# Supplementary material
Source: PubMed Central journal article supplement (PMC8943076)

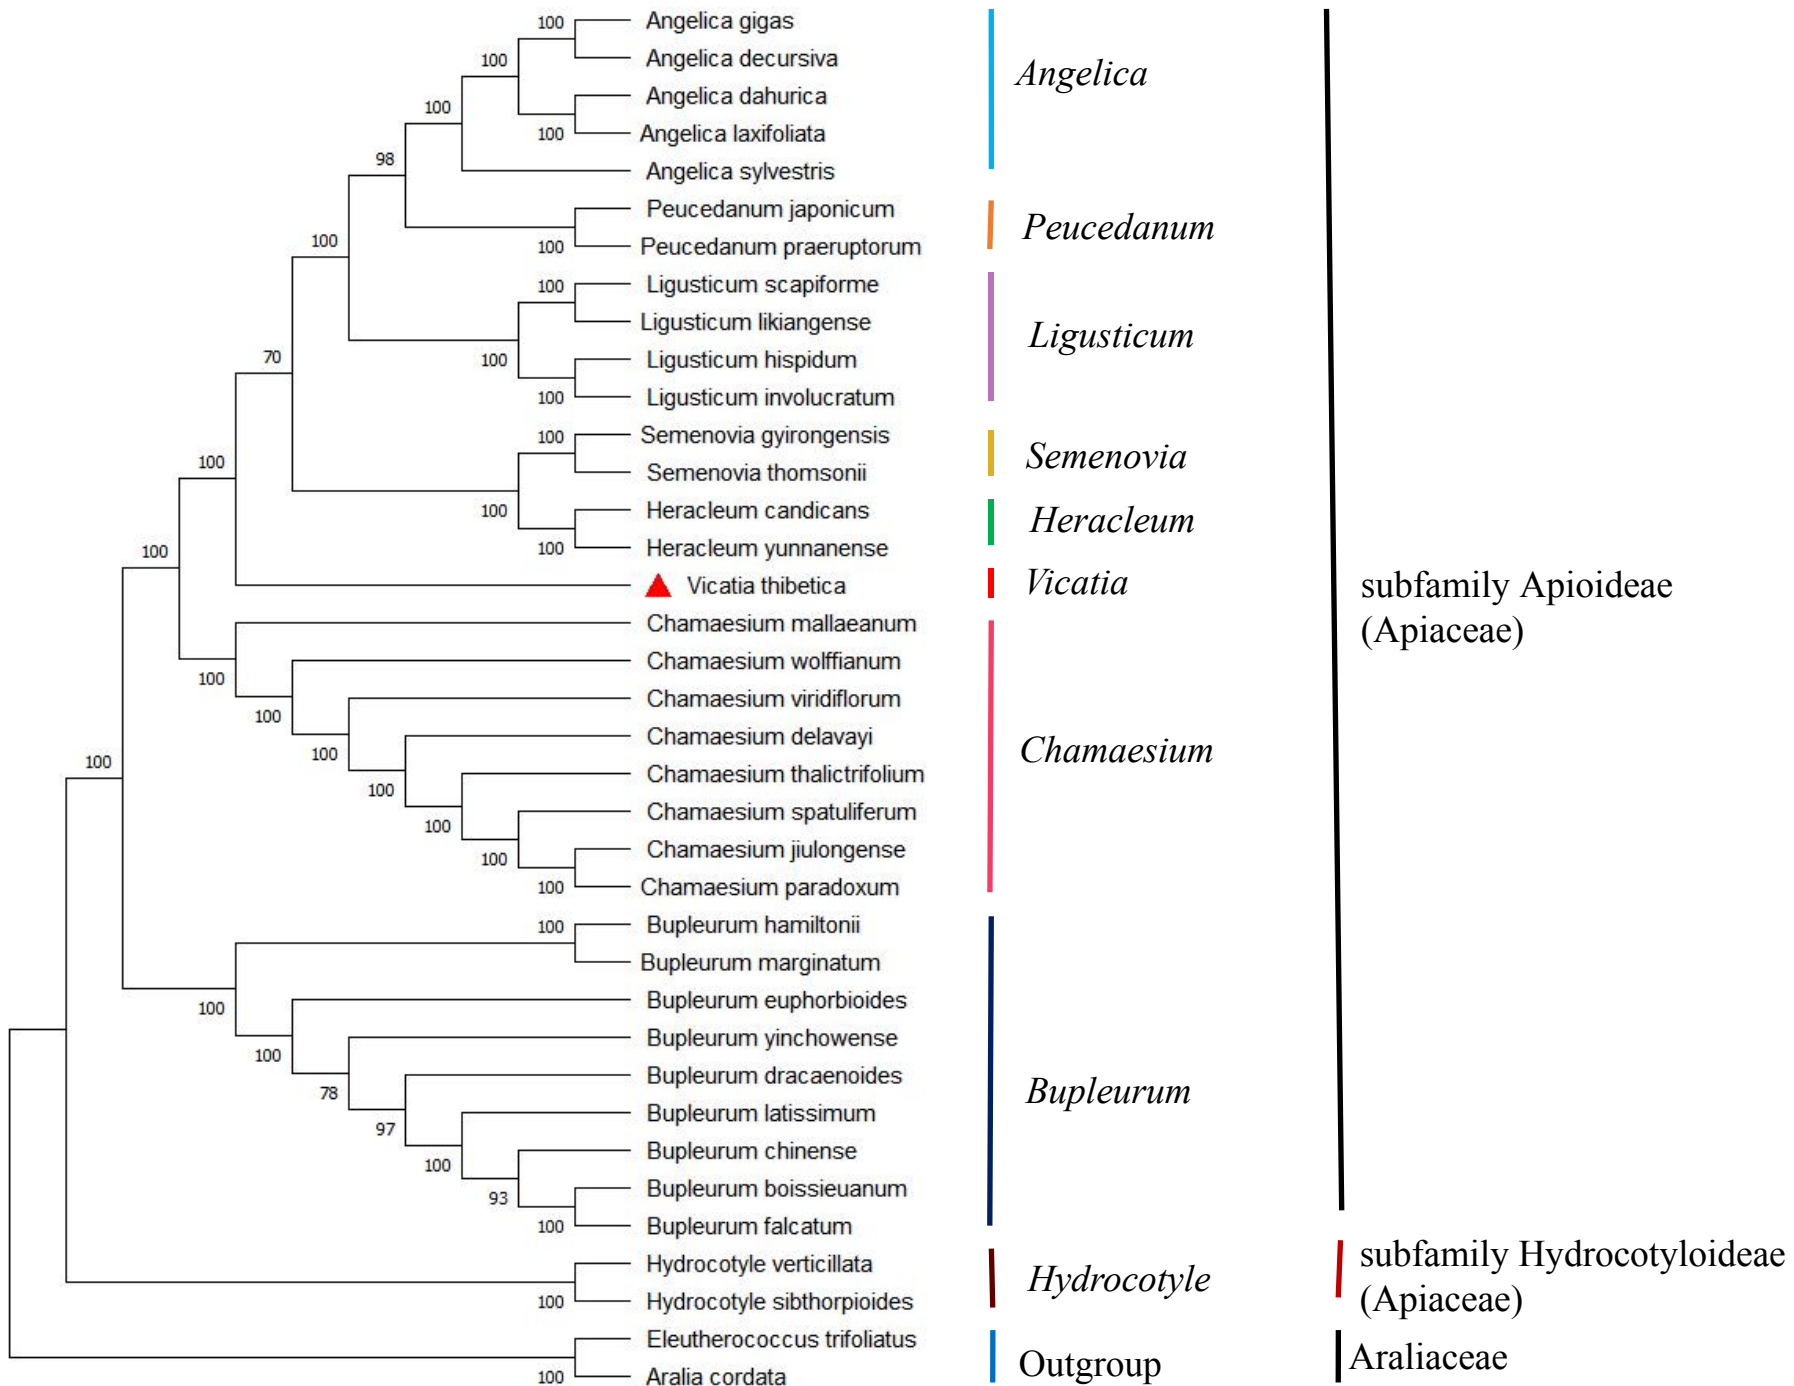

Supplement: 12298_2022_1154_MOESM1_ESM.pdf [file 12298_2022_1154_MOESM1_ESM.pdf]
